# Supplementary material for: Spatio-temporal Dynamics and Mechanisms of Stress Granule Assembly
Source: PubMed Central journal article supplement (PMC4482703; doi:10.1371/journal.pcbi.1004326), 2015-06-26
Supplement: pcbi.1004326.s004.pdf [file pcbi.1004326.s004.pdf]

Table S1 Parameters used for 3-step SS of SG assembly

| Parameter     | Value              | Unit      |
|---------------|--------------------|-----------|
| $TIA_1$       | 9081               | molecules |
| $TIA_2$       | 0                  | molecules |
| $TIA_3$       | 0                  | molecules |
| $TIA^*$       | 0                  | molecules |
| $k_{1-1}$     | $7 \times 10^4$    | /M/s      |
| $k_{1-2}$     | $5 \times 10^4$    | /M/s      |
| $k_{1-3}$     | $10^5$             | /M/s      |
| $k_{1-4}$     | $2 \times 10^6$    | /M/s      |
| $k_{2-2}$     | $10^6$             | /M/s      |
| $k_{2-3}$     | $10^6$             | /M/s      |
| $k_{2-4}$     | $10^6$             | /M/s      |
| $k_{3-3}$     | $10^6$             | /M/s      |
| $k_{3-4}$     | $10^6$             | /M/s      |
| $k_{4-4}$     | $10^6$             | /M/s      |
| $k_{b2}$      | 1                  | /s        |
| $k_{b3}$      | 0.1                | /s        |
| $k_{b4}$      | $3 \times 10^{-3}$ | /s        |
| $D_{TIA1-3}$  | $10^{-11}$         | $m^2/s$   |
| $D_{TIA^*}$   | $10^{-16}$         | $m^2/s$   |
| $r_{cell}$    | 6                  | $\mu m$   |
| $h_{cell}$    | 1.5                | $\mu m$   |
| $r_{nucleus}$ | 2                  | $\mu m$   |
| $h_{nucleus}$ | 1.5                | $\mu m$   |
| $p_n$         | 0.6                | –         |
| $p_m$         | 0.4                | –         |
